1 Running title: Mitotic organelle inheritance order

2

3 **An organelle inheritance pathway during polarized cell growth**

4

5 Kathryn W Li<sup>1</sup>, Ross TA Pedersen<sup>1,2</sup>, Michelle S Lu<sup>1</sup>, David G Drubin<sup>1\*</sup>

6

7 <sup>1</sup>Department of Molecular and Cell Biology, University of California, Berkeley, Berkeley, CA,  
8 94720

9 <sup>2</sup>Present address: Department of Embryology, Carnegie Institution for Science, Baltimore,  
10 MD 21218

11 \*Correspondence: [drubin@berkeley.edu](mailto:drubin@berkeley.edu)

12

13 Keywords: organelles, mitosis, polarity

14 **Summary statement**

15 Organelles are interconnected by contact sites, but they must be inherited from mother  
16 cells into buds during budding yeast mitosis. We report that this process occurs in a  
17 preferred sequence.

18 **Abstract**

19 Some organelles cannot be synthesized anew, so they are segregated into daughter cells  
20 during cell division. In *Saccharomyces cerevisiae*, daughter cells bud from mother cells and  
21 are populated by organelles inherited from the mothers. To determine whether this  
22 organelle inheritance occurs in a stereotyped manner, we tracked organelles using  
23 fluorescence microscopy. We describe a program for organelle inheritance in budding  
24 yeast. The cortical endoplasmic reticulum (ER) and peroxisomes are inherited concomitant  
25 with bud emergence. Next, vacuoles are inherited in small buds, followed closely by  
26 mitochondria. Finally, the nucleus and perinuclear ER are inherited when buds have nearly  
27 reached their maximal size. Because organelle inheritance timing correlates with bud  
28 morphology, which is coupled to the cell cycle, we tested whether organelle inheritance  
29 order is controlled by the cell cycle. By arresting cell cycle progression but allowing  
30 continued bud growth, we determined that organelle inheritance still occurs without cell  
31 cycle progression past S-phase, and that the general inheritance order is maintained. Thus,  
32 organelle inheritance follows a preferred order during polarized cell division, but it is not  
33 controlled exclusively by cell cycle signaling.

34

## 35 Introduction

36 Cell duplication via polarized cell growth presents a unique challenge to cellular  
37 organization. In contrast to isotropic growth – which can occur through expansion of  
38 existing cellular structure and organization – during polarized cell growth that leads to cell  
39 duplication, either a new cellular structure must be constructed from scratch, or existing  
40 components must be transported and rearranged within the cell in a regulated manner.  
41 Similarly, during development, neurons must sprout and elongate axons in order to  
42 properly wire the nervous system. This growth requires the coordination of the production  
43 and movement of various cellular building blocks, which is accomplished through signaling  
44 between the end of the growing axon and the cell body (Goldberg, 2003). Defects in  
45 organelle positioning within axons have been implicated in various neurological diseases  
46 including Charcot-Marie Tooth disorder (Suárez-Rivero et al., 2017).

47 Many organelles cannot be readily made de novo, and therefore must be trafficked  
48 into newly forming cellular structures, such as axons or yeast daughter cells during  
49 polarized growth (Nunnari and Walter, 1996; Warren and Wickner, 1996). This process is  
50 complicated by the fact that organelles are extensively interconnected through a network  
51 of membrane contact sites (Murley and Nunnari, 2016; Wu et al., 2018). These membrane  
52 contact sites have been implicated in crucial cellular processes ranging from lipid transfer  
53 between organelles to coordination of organelle division (AhYoung et al., 2015; Friedman  
54 et al., 2011; Lewis et al., 2016; Maeda et al., 2013). While organelle organization within the  
55 cytoplasm is critical for organelle function, how the ordered arrangement of organelles in  
56 the cytoplasm is maintained or reestablished as organelles are inherited during polarized  
57 cell growth remains a mystery.

58 To explore how directed movement of organelles is coordinated during polarized  
59 cell growth, we studied organelle inheritance in *S. cerevisiae*. This organism reproduces  
60 asexually by budding, wherein the daughter cell forms as a “bud” from the mother. A new  
61 cell is released by cytokinesis at the end of each cell cycle. Organelles and other cellular  
62 materials synthesized in the mother cell must be actively transported to the growing  
63 daughter cell. Numerous studies have investigated the molecular mechanisms that  
64 facilitate inheritance of individual organelles during *S. cerevisiae* bud growth. Most  
65 organelles, including endoplasmic reticulum (ER), peroxisomes, mitochondria, and

66 vacuoles, are transported by processive myosin motors along actin cables that extend from  
67 the mother cell into the bud (Pruyne et al., 2004; Weisman, 2006). Only nuclear movement  
68 into the bud depends on microtubules (Huffaker et al., 1988), though myosin and actin  
69 cables also participate (Yin et al., 2000). Despite extensive investigations into organelle  
70 inheritance pathways in budding yeast, these pathways have mostly been studied  
71 individually. Therefore, how inheritance of different organelles is coordinated remains  
72 largely unexplored.

73         Recent research hints that organelle inheritance may occur in an ordered manner.  
74 One study found that membrane contact sites formed between mitochondria and the  
75 plasma membrane of emerging buds serve as anchoring sites for cytoplasmic dynein  
76 motors, which reel in astral microtubules to move the nucleus into the bud (Kraft and  
77 Lackner, 2017). Such a mechanism, wherein inherited mitochondria set up the machinery  
78 to ensure nucleus inheritance, suggests a preferred order of organelle inheritance. We  
79 wondered whether other organelles were also inherited in a preferred order.

80         We performed time-lapse imaging of five organelles during budding yeast mitosis to  
81 compare their inheritance. We report a preferred succession of organelles into growing  
82 buds that occurs in three stages, beginning with cortical ER and peroxisome inheritance  
83 during bud emergence, followed by the vacuole and mitochondria into small buds, and,  
84 finally, ending with nuclear and associated nuclear ER inheritance into large buds. Neither  
85 organelle inheritance itself nor the ordering of these three stages requires continuous cell  
86 cycle progression, although the nucleus is not inherited and the inheritance order of the  
87 mitochondria and vacuole is reversed when the cell cycle is arrested in S-phase, which  
88 normally begins around the time of bud emergence. Our data suggest that interdependent  
89 translocation or signaling pathways orthogonal to cell cycle signaling enforce order on  
90 organelle inheritance during *S. cerevisiae* polarized growth.

## 91 **Results and Discussion**

92 To determine whether organelle inheritance follows a stereotyped order during budding  
93 yeast mitosis, we performed live-cell, 3D time-lapse imaging of five organelles. For each  
94 organelle, the time from bud emergence to organelle inheritance was measured. As  
95 established in the classic studies of Hartwell and colleagues (Culotti and Hartwell, 1971;  
96 Hartwell, 1971; Hartwell et al., 1970), bud morphology of logarithmically growing *S.*  
97 *cerevisiae* cells is highly correlated with cell cycle stage. We defined the start of each  
98 organelle inheritance time course as the time of bud emergence, allowing us to compare  
99 the timing of inheritance of organelles in different cells. We imaged cells using only bright  
100 field microscopy for varying time periods before collecting fluorescence time courses in  
101 order to capture both the moment of bud emergence and the organelle inheritance process  
102 at high temporal resolution and without significant photobleaching of genetically-encoded  
103 fluorophores. To mark the different organelles, yeast strains endogenously expressing C-  
104 terminal GFP fusions of proteins known to localize to the organelle of interest were used in  
105 most cases. Peroxisomes were visualized via Pex3-GFP (Huh et al., 2003), vacuoles were  
106 visualized via Vph1-GFP (Lu and Drubin, 2020), mitochondria were visualized via Cit1-GFP  
107 (Sawyer et al., 2019), and nuclei were visualized via Nup59-GFP (Madrid et al., 2006). The  
108 ER was visualized via expression of a single copy of GFP-HDEL integrated into the genome  
109 at the *TPI1* locus (Lu and Drubin, 2020). Cells also endogenously expressed an mCherry-  
110 tagged version of the contractile ring myosin Myo1 to clearly delineate the boundary  
111 between mother and daughter cells and to mark the onset of cytokinesis, when the ring  
112 begins to contract.

113 Our imaging data indicate that organelle inheritance can be described as occurring  
114 in 3 stages. The cortical ER, which lines the periphery of the cell, and the peroxisomes, are  
115 the earliest organelles inherited, with inheritance appearing to begin concomitantly with  
116 bud emergence (Fig. 1A-B). Peroxisomes are the most dynamic of the organelles that we  
117 imaged, and they became particularly difficult to track as the growing bud got bigger,  
118 allowing them more space to dynamically occupy. Nevertheless, they can clearly be seen  
119 entering the smallest buds observed (Fig. 1A and movie 1). Vacuoles and mitochondria are  
120 inherited slightly later in small buds, with inheritance commencing 10-20 minutes after  
121 bud emergence (Fig. 1C-D). Finally, nuclei are inherited once cells have reached the large-

122 budded stage, ~40 minutes after bud emergence (Fig. 1E). Perinuclear ER, which is  
123 continuous with the nuclear envelope, behaves similarly to the nucleus itself (Fig. 1A).

124         Plotting the average, normalized organelle fluorescence in the bud as a function of  
125 time for all five organelles on the same axes reveals three stages of inheritance, beginning  
126 when cortical ER and peroxisomes are inherited, followed by vacuoles and mitochondria,  
127 and ending with nuclear inheritance (Fig. 1F). We functionally defined an inheritance event  
128 for an organelle as being the timepoint when fluorescence intensity for that organelle  
129 accumulated to a threshold percentage of its maximum in the bud. The threshold was  
130 defined operationally as a level of fluorescence intensity past which traces rarely fluctuated  
131 back to zero. Directly comparing the timepoint of inheritance for each organelle confirms  
132 the impression that peroxisomes and cortical ER are inherited with similar kinetics (Fig.  
133 1G). Our statistical tests even indicated that cortical ER is inherited significantly before  
134 peroxisomes, but the difference in timing and p-value for this result were each an order of  
135 magnitude less than for all other observed differences. Mitochondria and vacuoles are  
136 inherited with similar kinetics, significantly after the peroxisomes. Finally, nuclei are  
137 inherited significantly after all other organelles. While we were able to define these three  
138 stages of inheritance by imaging organelles individually and using bud emergence as a  
139 common time reference, we were not able to resolve fine-grained differences in the timing  
140 of organelle inheritance within each stage by this analysis.

141         To resolve smaller differences in inheritance timing for organelles whose  
142 inheritance timing was indistinguishable using single-color imaging, we imaged pairs of  
143 organelles using two-color 3D time-lapse imaging. Although we occasionally observed that  
144 the cortical ER was inherited in emerging buds prior to peroxisomes, the inheritance  
145 timing of cortical ER and peroxisomes was still indistinguishable in the vast majority of  
146 cases (Fig. 2A, movie 1). On the other hand, when we directly compared vacuole  
147 inheritance with mitochondrial inheritance, we observed that vacuoles are inherited  
148 slightly before mitochondria (Fig. 2B, movie 2). Taken together, these results describe a  
149 timeline for organelle inheritance (Fig. 2C). Cortical ER and peroxisomes are inherited  
150 immediately upon bud emergence. Next, vacuoles and then the mitochondria are inherited  
151 at the small bud stage. Finally, nuclei are inherited at the large-budded stage.

152 We next set out to determine whether the order of organelle inheritance that we  
153 observed is coordinated with cell cycle events. Because organelle inheritance events were  
154 observed at specific points in the bud morphogenesis cycle, and because the bud  
155 morphogenesis cycle is tightly linked to the cell cycle, we wondered whether cell cycle  
156 signaling dictates the order of organelle inheritance. To test this possibility, we took  
157 advantage of the fact that hydroxyurea (HU) arrests the cell cycle of budding yeast at S-  
158 phase onset without arresting the bud morphogenesis cycle (Amberg et al., 2005). Since S-  
159 phase begins around the time of bud emergence, the result of such an arrest is progression  
160 of the bud growth cycle without corresponding cell cycle progression. The HU treatment  
161 allowed us to assess how organelles are inherited when cell cycle progression is blocked at  
162 S-phase onset.

163 While we hypothesized that organelle inheritance might be controlled in part by the  
164 cell cycle, we found instead that organelle inheritance mostly occurs even in the absence of  
165 cell cycle progression past S-phase onset. We arrested cells in HU for 3 hours, sufficient  
166 time for cells that were past S-phase at the time of drug addition to complete their cell cycle  
167 and arrest at the following S-phase, giving us confidence that all cells were S-phase  
168 arrested. After the 3-hour S-phase arrest, cells were morphologically arrested at the large-  
169 budded stage of the growth cycle, which normally corresponds to late M-phase (Fig. 3A).  
170 Even though cortical ER and peroxisomes are normally inherited in emerging buds (around  
171 the time of S-phase onset) and all other organelles are inherited in growing buds after S-  
172 phase onset, we nevertheless observed cortical ER, peroxisomes, vacuoles, and  
173 mitochondria in the majority of the large buds that had grown from the S-phase arrested  
174 cells (Fig. 3A-B). Nuclei, on the other hand, remained either in the mother cell (not  
175 inherited) or at the bud neck (partially inherited) (Fig. 3A-B). Thus, even in the absence of  
176 cell cycle progression past S-phase, most organelle inheritance can proceed.

177 When we examined organelle inheritance timing, we found that the order of the  
178 three stages of inheritance we observed previously remained the same even without  
179 continuous cell cycle progression. To study organelle inheritance timing, we used alpha  
180 factor to first synchronize cells in G1, prior to S-phase and bud emergence, and then  
181 released them into HU for imaging (Amberg et al., 2005). This eliminated the possibility  
182 that bud growth observed represented cells that were past S-phase at the time of HU



183 addition, ensuring that all bud growth occurred under HU arrest. This procedure allowed  
184 us to record a time series of organelle inheritance while bud growth was occurring in cell  
185 cycle arrested cells. We found that both the cortical ER and peroxisomes were still  
186 inherited at bud emergence, with the inheritance timing between these two organelles still  
187 mostly indistinguishable (Fig. 4A, movie 3). As in our earlier results, peroxisomes were still  
188 clearly inherited before the mitochondria, indicating that the first two stages of organelle  
189 inheritance that we had observed were still separable (Fig. 4B, movie 4). In a departure  
190 from our results with unmanipulated cells, we observed the mitochondria being inherited  
191 before the vacuole, but both organelles were still inherited into small buds (Fig. 4C, movie  
192 5). Thus, despite small changes in the order of organelle inheritance within a given stage,  
193 such as with the vacuole and mitochondria, the overall order of the different stages  
194 remained the same in the absence of cell cycle progression past S-phase.

195 Our results demonstrate that organelle inheritance in budding yeast occurs in a  
196 predictable order. Previous studies of the molecular mechanisms underlying organelle  
197 inheritance in this organism typically studied organelles individually, going so far as to  
198 demonstrate that failed inheritance of one organelle had no major effects on the  
199 inheritance of others (see for example: Du *et al.*, 2001; Ishikawa *et al.*, 2003). More recent  
200 studies, however, hint that some organelle inheritance pathways are interdependent on  
201 one another (Kraft and Lackner, 2017). The fact that organelle inheritance follows a  
202 stereotyped timeline (Fig. 2C) suggests that other such interdependent organelle  
203 inheritance pathways may be at play during budding yeast mitosis.

204 We also found that most organelles are inherited in the absence of cell cycle events  
205 subsequent to entry into S-phase. Some studies have shown that proteins involved in  
206 inheritance of specific organelles may be regulated by cell cycle signaling (Fagarasanu *et*  
207 *al.*, 2005; Peng and Weisman, 2008). However, our results demonstrate that successful  
208 inheritance of the cortical ER, peroxisomes, vacuoles, and mitochondria still occurs under  
209 S-phase arrest (Fig. 3A-B). Moreover, the coupling of organelle inheritance to bud  
210 morphology remains largely unchanged, with organelles being inherited during the same  
211 morphological stages as described in the timeline (Fig. 2C). This observation suggests that  
212 while cell cycle signaling may influence inheritance of individual organelles, different  
213 signaling pathways regulate the relative order in which organelles are inherited. Given that

214 inheritance of each organelle occurs at distinct stages of bud emergence or growth, the  
215 timing of organelle inheritance may be in part coordinated with bud morphogenesis. A  
216 recent study described how non cell cycle cues – including signaling by the polarity  
217 regulator Cdc42, priming of septins, and cell wall weakening – control the timing of bud  
218 emergence (Lai et al., 2018). Furthermore, one study showed that loss of cortical ER  
219 inheritance disrupts septin assembly, hinting that organelle inheritance and bud  
220 morphogenesis may be interdependent (Loewen et al., 2007). After bud emergence,  
221 inheritance of organelles may be governed by interdependent inheritance pathways. These  
222 pathways may ensure that organelle-organelle contact sites and their associated inter-  
223 organelle functions, such as lipid exchange, are maintained after cytokinesis.

## 224 **Materials and Methods**

225

### 226 *Strains and Plasmids*

227 All strains used in this study are listed in Table S1. Budding yeast strains were all derived  
228 from wild-type diploid DDY1102 and propagated using standard techniques (Amberg *et al.*,  
229 2005). The GFP-HDEL strain was constructed by integrating a GFP-HDEL::LEU plasmid  
230 (courtesy of Laura Lackner) at the *TPI1* locus. This plasmid contains the pRS305 backbone  
231 and contains the *TPI1* promoter followed by the leader sequence of *KAR2* (a.a. 1-52),  
232 followed by GFP, and then HDEL. C-terminal GFP and mCherry fusions were constructed as  
233 described previously (Lee *et al.*, 2013; Longtine *et al.*, 1998) and verified using PCR.

234

### 235 *Live-Cell Imaging*

236 Cells grown to mid-log phase in imaging media (synthetic minimal media supplemented  
237 with adenine, L-histidine, L-leucine, L-lysine, L-methionine, uracil, and 2% glucose) were  
238 immobilized on coverslips coated with 0.2 mg/ml concanavalin A.

239 Epifluorescence microscopy was conducted using a Nikon Eclipse Ti inverted  
240 microscope with a Nikon 100× 1.4-NA Plan Apo VC oil-immersion objective and an Andor  
241 Neo 5.5 sCMOS camera. A Lumencore Spectra X LED light source with an FF-493/574-Di01  
242 dual-pass dichroic mirror and FF01-512/630-25 dual-pass emission filters (Semrock) was  
243 used for two-color imaging of GFP and mCherry channels. This setup was controlled by  
244 Nikon Elements software. Imaging was conducted in a room maintained at 23-25°C.

245 To study organelle inheritance events relative to time of bud emergence, cells were  
246 first imaged under bright field for various times to capture the moment bud emergence  
247 occurred. Immediately afterwards, cells were imaged using epifluorescence microscopy to  
248 monitor inheritance of fluorescently labelled organelles.

249 Image visualization was carried out with Fiji software (National Institutes of  
250 Health). For figure panels, cells were cropped, background signal was uniformly  
251 subtracted, and photobleaching was corrected using a custom Fiji macro. Figures were then  
252 assembled in Adobe Illustrator 2019.

### 253 *Hydroxyurea and alpha factor experiments*

254 Appropriate working concentrations of hydroxyurea and alpha factor were determined  
255 empirically (Fig. S1A-B) and were generally in line with concentrations used previously  
256 (Amberg et al., 2005).

257 Hydroxyurea was purchased from Sigma-Aldrich. For single arrest experiments,  
258 cells were adhered to coverslips with concanavalin A and treated with 500  $\mu$ L of 200  $\mu$ M  
259 hydroxyurea in imaging media for three hours. Cells were then imaged using  
260 epifluorescence microscopy.

261 Alpha factor was synthesized by David King (University of California, Berkeley) and  
262 stored as a stock at 10 mg/mL in 0.1 M Sodium Acetate buffer (pH 5.2). Cells were adhered  
263 to coverslips with concanavalin A and submerged in 500  $\mu$ L of 3  $\mu$ M alpha factor in imaging  
264 media for three hours. To release from the arrest, the imaging media with alpha factor was  
265 removed and new media with 0.1 mg/ml Pronase E (Sigma P-6911) was added to  
266 inactivate any remaining alpha factor. This process was repeated 2-3 times after which 1.5  
267 mL of imaging media with 300  $\mu$ M hydroxyurea was added.

268

### 269 *Data analysis*

270 To measure fluorescence intensity of an organelle in the bud during inheritance, time lapse  
271 images of cells at the appropriate bud growth stage were cropped. Cropped time lapses  
272 were segmented using the Allen Cell Structure Segmenter (Allen Institute for Cell Science,  
273 Seattle, WA) and stacks of segmented images at each time point were converted to summed  
274 projections. These time lapses were then analyzed using Fiji software (National Institutes  
275 of Health). Raw integrated fluorescence intensity was measured in manually drawn  
276 selections surrounding and encompassing the bud, and normalized relative to the  
277 maximum total fluorescence for each time lapse. Time relative to bud emergence was  
278 calculated using the corresponding bright field time lapse.

279 Cells were first visualized in Fiji and background subtraction and photobleaching  
280 correction were applied as described in Live-Cell imaging. For the hydroxyurea-only arrest  
281 experiments, organelles in cells were characterized as “inherited” if they were clearly  
282 present in the bud at the time of imaging, “not inherited” if no organelles were seen in the  
283 bud, and “partially inherited” if all organelles were either in the mother cell or crossing the

284 bud neck. In characterizing the relative order of inheritance for two organelles, one  
285 organelle was considered inherited first if during the time lapse the organelle entered the  
286 bud before the other organelle or if the organelle was present in the bud before the other  
287 organelle began to be segregated to the bud. The order was considered “indistinguishable”  
288 if both organelles appeared to be inherited at the same time.

289

### 290 *Statistics and reproducibility of experiments*

291 All data presented were replicated in at least three distinct experiments. Multiple cells from  
292 each replicate were analyzed and data from different days were pooled together because  
293 they were indistinguishable. The number of cells analyzed at each timepoint for Figure 1 is  
294 displayed in Figure S2, and the number of cells analyzed for the remainder of the results is  
295 shown in the figure legend.

296 Statistical analyses (Welch’s ANOVA test followed by Games-Howell posthoc test)  
297 were performed in Python using the Pingouin statistical package (Vallat, 2018).

298 **Acknowledgements**

299 We thank Cyna Shirazinejad for data analysis assistance and Zane Bergman and Jonathan

300 Wong for advice on experimental design. This work was funded by NIGMS grant [R35](#)

301 [GM118149](#) to DGD.

## 302 References

303

304 **AhYoung, A. P., Jiang, J., Zhang, J., Dang, X. K., Loo, J. A., Zhou, Z. H. and Egea, P. F.**  
305 (2015). Conserved SMP domains of the ERMES complex bind phospholipids and  
306 mediate tether assembly. *Proc. Natl. Acad. Sci. U. S. A.* **112**, E3179–E3188.

307 **Amberg, D. C., Burke, D. J. and Strathern, J. N.** (2005). *Methods in Yeast Genetics: A Cold*  
308 *Spring Harbor Laboratory Course Manual, 2005 Edition.*

309 **Culotti, J. and Hartwell, L. H.** (1971). Genetic control of the cell division cycle in yeast. 3.  
310 Seven genes controlling nuclear division. *Exp. Cell Res.* **67**, 389–401.

311 **Du, Y., Pypaert, M., Novick, P. and Ferro-Novick, S.** (2001). Aux1p/Swa2p is required for  
312 cortical endoplasmic reticulum inheritance in *Saccharomyces cerevisiae*. *Mol. Biol. Cell*  
313 **12**, 2614–2628.

314 **Fagarasanu, M., Fagarasanu, A., Tam, Y. Y. C., Aitchison, J. D. and Rachubinski, R. A.**  
315 (2005). Inp1p is a peroxisomal membrane protein required for peroxisome  
316 inheritance in *Saccharomyces cerevisiae*. *J. Cell Biol.* **169**, 765–775.

317 **Friedman, J. R., Lackner, L. L., West, M., DiBenedetto, J. R., Nunnari, J. and Voeltz, G. K.**  
318 (2011). ER tubules mark sites of mitochondrial division. *Science* **334**, 358–362.

319 **Goldberg, J. L.** (2003). How does an axon grow? *Genes Dev.* **17**, 941–958.

320 **Hartwell, L. H.** (1971). Genetic Control of the Cell Division Cycle in Yeast II. Genes  
321 Controlling DNA Replication and its Initiation. *J. Mol. Biol.* **59**, 183–194.

322 **Hartwell, L. H., Culotti, J. and Reid, B.** (1970). Genetic control of the cell-division cycle in  
323 yeast. I. Detection of mutants. *Proc. Natl. Acad. Sci. U. S. A.* **66**, 352–359.

324 **Huffaker, T. C., Thomas, J. H. and Botstein, D.** (1988). Diverse effects of  $\beta$ -tubulin  
325 mutations on microtubule formation and function. *J. Cell Biol.* **106**, 1997–2010.

326 **Huh, K., W., Falvo, V., J., Gerke, C., L., Carroll, S., A., Howson, W., R., et al.** (2003). Global  
327 analysis of protein localization in budding yeast. *Nature* **425**, 686–691.

328 **Ishikawa, K., Catlett, N. L., Novak, J. L., Tang, F., Nau, J. J. and Weisman, L. S.** (2003).  
329 Identification of an organelle-specific myosin V receptor. *J. Cell Biol.* **160**, 887–897.

330 **Kraft, L. M. and Lackner, L. L.** (2017). Mitochondria-driven assembly of a cortical anchor  
331 for mitochondria and dynein. *J. Cell Biol.* **216**, 3061–3071.

332 **Lai, H., Chiou, J. G., Zhurikhina, A., Zyla, T. R., Tsygankov, D. and Lew, D. J.** (2018).  
333 Temporal regulation of morphogenetic events in *Saccharomyces cerevisiae*. *Mol. Biol.*  
334 *Cell* **29**, 2069–2083.

335 **Lee, S., Lim, W. A. and Thorn, K. S.** (2013). Improved Blue, Green, and Red Fluorescent  
336 Protein Tagging Vectors for *S. cerevisiae*. *PLoS One* **8**, 4–11.

337 **Lewis, S. C., Uchiyama, L. F. and Nunnari, J.** (2016). ER-mitochondria contacts couple  
338 mtDNA synthesis with Mitochondrial division in human cells. *Science* **353**,

339 **Loewen, C. J. R., Young, B. P., Tavassoli, S. and Levine, T. P.** (2007). Inheritance of  
340 cortical ER in yeast is required for normal septin organization. *J. Cell Biol.* **179**, 467–  
341 483.

342 **Longtine, M. S., McKenzie, a, Demarini, D. J., Shah, N. G., Wach, a, Brachat, a,**

- 343 **Philippsen, P. and Pringle, J. R.** (1998). Additional modules for versatile and  
344 economical PCR-based gene deletion and modification in *Saccharomyces cerevisiae*.  
345 *Yeast* **14**, 953–61.
- 346 **Lu, M. S. and Drubin, D. G.** (2020). Cdc42 GTPase regulates ESCRTs in nuclear envelope  
347 sealing and ER remodeling. *J. Cell Biol.* **219**,.
- 348 **Madrid, A. S., Mancuso, J., Cande, W. Z. and Weis, K.** (2006). The role of the integral  
349 membrane nucleoporins Ndc1p and Pom152p in nuclear pore complex assembly and  
350 function. *J. Cell Biol.* **173**, 361–371.
- 351 **Maeda, K., Anand, K., Chiapparino, A., Kumar, A., Poletto, M., Kaksonen, M. and Gavin,  
352 A. C.** (2013). Interactome map uncovers phosphatidylserine transport by oxysterol-  
353 binding proteins. *Nature* **501**, 257–261.
- 354 **Murley, A. and Nunnari, J.** (2016). The Emerging Network of Mitochondria-Organelle  
355 Contacts. *Mol. Cell* **61**, 648–653.
- 356 **Nunnari, J. and Walter, P.** (1996). Regulation of organelle biogenesis. *Cell* **84**, 389–394.
- 357 **Peng, Y. and Weisman, L. S.** (2008). The Cyclin-Dependent Kinase Cdk1 Directly Regulates  
358 Vacuole Inheritance. *Dev. Cell* **15**, 478–485.
- 359 **Pruyne, D., Legesse-Miller, A., Gao, L., Dong, Y. and Bretscher, A.** (2004). Mechanisms of  
360 Polarized Growth and Organelle Segregation in Yeast. *Annu. Rev. Cell Dev. Biol.* **20**,  
361 559–591.
- 362 **Sawyer, E. M., Joshi, P. R., Jorgensen, V., Yunus, J., Berchowitz, L. E. and Ünal, E.** (2019).  
363 Developmental regulation of an organelle tether coordinates mitochondrial  
364 remodeling in meiosis. *J. Cell Biol.* **218**, 559–579.
- 365 **Suárez-Rivero, J., Villanueva-Paz, M., de la Cruz-Ojeda, P., de la Mata, M., Cotán, D.,  
366 Oropesa-Ávila, M., de Laveria, I., Álvarez-Córdoba, M., Luzón-Hidalgo, R. and  
367 Sánchez-Alcázar, J.** (2017). Mitochondrial Dynamics in Mitochondrial Diseases.  
368 *Diseases* **5**, 1.
- 369 **Vallat, R.** (2018). Pingouin: statistics in Python. *J. Open Source Softw.* **3**, 1026.
- 370 **Warren, G. and Wickner, W.** (1996). Organelle inheritance. *Cell* **84**, 395–400.
- 371 **Weisman, L. S.** (2006). Organelles on the move: insights from yeast vacuole inheritance.  
372 *Nat. Rev. Mol. Cell Biol.* **7**, 243–252.
- 373 **Wu, H., Carvalho, P. and Voeltz, G. K.** (2018). Here, there, and everywhere: The  
374 importance of ER membrane contact sites. *Science* **361**,.
- 375 **Yin, H., Pruyne, D., Huffaker, T. C. and Bretscher, A.** (2000). Myosin V orientates the  
376 mitotic spindle in yeast. *Nature* **406**, 1013–1015.
- 377



## 378 **Figures and tables**

379

### 380 **Figure 1: Organelle inheritance occurs in three distinct stages**

381 (A) Left: maximum intensity projections from epifluorescence stacks of cells endogenously  
382 expressing Myo1-mCherry (magenta) to label the cytokinetic contractile ring and  
383 expressing GFP-HDEL to label the ER (green). The cell outline from bright field imaging is  
384 in gray. White arrows point to the bud in each frame. Cells at different phases of the cell  
385 cycle are juxtaposed to illustrate succession. Right: normalized fluorescence intensity of  
386 GFP-HDEL in the bud as a function of time from when bud emergence is detectable,  
387 measured in live cells. The dark blue line represents the mean fluorescence vs. time trace  
388 calculated from measurements made on 34 cells (individual measurements shown in light  
389 blue). (B-E) Left: maximum intensity projections of cells endogenously expressing Myo1-  
390 mCherry (magenta) and a Pex3-GFP peroxisome marker (green, B), Vph1-GFP vacuole  
391 marker (green, C), Cit1-GFP mitochondrial marker (green, D), or Nup59-GFP nuclear  
392 envelope marker (green, E), montaged as in (A). The cell outline from bright field imaging  
393 is in gray. Right: normalized fluorescence intensity of GFP signal in the bud as a function of  
394 time from bud emergence, measured in live cells. Dark blue lines are mean fluorescence vs.  
395 time traces calculated from 29 (B), 12 (C), 17 (D), and 22 (E) individual traces, individual  
396 measurements are shown in light blue as in (A). (F) Average fluorescence (with 95%  
397 confidence intervals) vs. time traces for organelles imaged in panels A-E plotted on the  
398 same axes for direct comparison. (G) Violin plots for the inheritance times of the organelles  
399 imaged in panels A-E with 95% confidence intervals shown in white and raw data shown as  
400 dark gray points. Inheritance time was defined as the first time after bud emergence when  
401 the bud fluorescence surpassed 0.5% of the maximum total fluorescence for the  
402 peroxisome time lapses or 2.5% of the maximum total fluorescence for the other organelle  
403 time lapses, which approximates the inflection point of the curves. Organelle inheritance  
404 times were compared by Welch's ANOVA ( $F=165$ ) followed by Games-Howell test and  
405 asterisks indicate statistical significance between organelles whose inheritance time  
406 confidence intervals do not overlap. The 95% confidence interval for the timing of nuclear  
407 inheritance did not overlap with the 95% confidence interval for any other organelle

408 inheritance time, so it was excluded from statistical tests and considered significantly  
409 different from all other inheritance times. \*  $p < 0.05$  ( $p = 0.0193$ ), \*\*  $p < 0.01$  ( $p = 0.0010$ )

410

411 **Figure 2: Direct comparison of inheritance within budding phases resolves order**  
412 **of inheritance events to elucidate an inheritance timeline**

413 (A) Left: maximum intensity projections from a 3D time lapse epifluorescence series of a cell  
414 expressing a GFP-HDEL ER marker (green) and endogenously expressing a Pex3-mCherry  
415 peroxisome marker (magenta). The cell outline from bright field imaging is in gray. White  
416 arrows point to the bud in each frame. Minutes elapsed from the start of the time lapse are  
417 shown on the upper right corner of each frame. Right: Percent of 53 cells in which the ER is  
418 inherited before the peroxisomes (green bar), the peroxisomes are inherited before the ER  
419 (magenta bar), or the order is indistinguishable (yellow bar). (B) Left: maximum intensity  
420 projections from a 3D time lapse epifluorescence series of a cell endogenously expressing a  
421 Vph1-GFP vacuole marker (green) and a Cit1-mCherry mitochondrial marker (magenta).  
422 The cell outline from bright field imaging is in gray. Minutes elapsed from the start of the  
423 time lapse are shown on the upper right of each frame. Right: Percent of 117 cells in which  
424 the mitochondria are inherited before the vacuole (green bar), the vacuole is inherited  
425 before the mitochondria (pink bar), or the order is indistinguishable (yellow bar). (C) A  
426 timeline summarizing the observed inheritance timing of organelles during yeast budding.

427

428 **Figure 3: Organelle inheritance occurs in the absence of continuous cell cycle**  
429 **signaling**

430 (A) Maximum intensity projections from epifluorescence stacks of cells arrested with  
431 hydroxyurea for 3 hours. From left to right, cells are expressing the ER label GFP-HDEL to  
432 visualize the cortical ER, endogenously expressing Pex3-mCherry to label peroxisomes,  
433 Vph1-GFP to label the vacuole, Cit1-mCherry to label mitochondria, and expressing the ER  
434 label GFP-HDEL to visualize the perinuclear ER (all shown in green). The cell outline from  
435 bright field imaging is in gray. White arrows point to the bud in each frame. (B) Percentage  
436 of cells ( $n=69$  for cortical ER, peroxisome, and perinuclear ER;  $n=75$  for vacuole and  
437 mitochondria) in which the organelle of interest was inherited (green bar), not inherited  
438 (pink bar), or partially inherited (yellow bar) after 3 hours of hydroxyurea arrest.

439

440 **Figure 4: Order of organelle inheritance remains largely normal without cell cycle**  
441 **progression past S-phase**

442 All images on the left show maximum intensity projections from 3D epifluorescence time  
443 lapse series of cells after arresting with alpha factor for 3 hours and releasing into  
444 hydroxyurea. The cell outline from bright field imaging is in gray. White arrows point to the  
445 bud in each frame. Minutes elapsed from the start of the time lapse are shown on the upper  
446 right of each frame. (A) Left: A cell expressing GFP-HDEL (green) and endogenously  
447 expressing Pex3-mCherry (magenta). Right: Percentage of 31 cells where the ER is  
448 inherited before the peroxisomes (green bar), the peroxisomes are inherited before the ER  
449 (magenta bar), or the exact order is indistinguishable (yellow bar). (B) Left: A cell  
450 endogenously expressing Pex3-GFP (green) and Cit1-mCherry (magenta). Right: Percent of  
451 38 cells in which the peroxisomes are inherited before the mitochondria (green bar), the  
452 mitochondria is inherited before the peroxisomes (magenta bar), or the order is  
453 indistinguishable (yellow bar). (C) Left: A cell endogenously expressing Vph1-GFP (green)  
454 and Cit1-mCherry (magenta). Right: Percent of 38 cells in which the vacuole is inherited  
455 before the mitochondria (green bar), the mitochondria are inherited before the vacuole  
456 (magenta bar), or the order is indistinguishable (yellow bar).

457

458 **Figure S1: Titrations of hydroxyurea and mating factor on organelle-labelled cells**

459 (A) Effects of hydroxyurea on cells of our background. Cells were treated with hydroxyurea  
460 for three hours at the indicated concentration and imaged in brightfield. (B) Effects of alpha  
461 factor on matA cells of our background. Cells were submerged in alpha factor for four hours  
462 at the indicated concentration and imaged in brightfield.

463

464 **Figure S2: Distributions of data points used in graphing organelle inheritance**

465 Histograms depicting the number of cells analyzed per time point past bud emergence used  
466 to plot normalized bud fluorescence in Figure 1F. Data from cells labelling the ER (A),  
467 peroxisomes (B), vacuoles (C), mitochondria (D), and nucleus (E) are shown in separate  
468 panels.

469

470 **Movie 1: Inheritance of ER and peroxisomes into emerging buds**

471 Maximum intensity projection movie from 3D time lapse epifluorescence imaging of a cell  
472 expressing a GFP-HDEL ER marker (green) and endogenously expressing a Pex3-mCherry  
473 peroxisome marker (magenta). The cell outline from bright field imaging is in gray.

474

475 **Movie 2: Inheritance of vacuoles and mitochondria into small buds**

476 Maximum intensity projection movie from 3D time lapse epifluorescence imaging of a cell  
477 endogenously expressing a Vph1-GFP vacuole marker (green) and a Cit1-mCherry  
478 mitochondrial marker (magenta). The cell outline from bright field imaging is in gray.

479

480 **Movie 3: Inheritance of ER and peroxisomes in hydroxyurea-arrested cells**

481 Maximum intensity projection movie from 3D time lapse epifluorescence imaging of a cell  
482 expressing a GFP-HDEL ER marker (green) and endogenously expressing a Pex3-mCherry  
483 peroxisome marker (magenta), arrested in early S-phase with hydroxyurea. The cell outline  
484 from bright field imaging is in gray.

485

486 **Movie 4: Inheritance of peroxisomes and mitochondria in hydroxyurea-arrested  
487 cells**

488 Maximum intensity projection movie from 3D time lapse epifluorescence imaging of a cell  
489 endogenously expressing a Pex3-GFP peroxisome marker (green) and a Cit1-mCherry  
490 mitochondrial marker (magenta), arrested in early S-phase with hydroxyurea. The cell  
491 outline from bright field imaging is in gray.

492

493 **Movie 5: Inheritance of peroxisomes and mitochondria in hydroxyurea-arrested  
494 cells**

495 Maximum intensity projection movie from 3D time lapse epifluorescence imaging of a cell  
496 endogenously expressing a Pex3-GFP peroxisome marker (green) and a Cit1-mCherry  
497 mitochondrial marker (magenta), arrested in early S-phase with hydroxyurea. The cell  
498 outline from bright field imaging is in gray.

499 **Table 1. Strains used in this study**

| <b>Name</b> | <b>Genotype</b>                                                                                            | <b>Source</b>                |
|-------------|------------------------------------------------------------------------------------------------------------|------------------------------|
| DDY1102     | <i>MATa/MATα his3-Δ200/his3-Δ200, leu2-3, 112/leu2-3, 112, ura3-52/ura3-52, ade2-1/ADE2, lys2-801/LYS2</i> | Drubin laboratory collection |
| DDY5792     | <i>MATα his3-Δ200, leu2-3, 112, ura3-52, Myo1-mCherry::KanMx, tpi1::pRS305-KAR2-GFP-HDEL</i>               | This study                   |
| DDY5793     | <i>MATα his3-Δ200, leu2-3, 112, ura3-52, Myo1-mCherry::KanMx, Pex3-GFP::HIS</i>                            | This study                   |
| DDY5794     | <i>MATα his3-Δ200, leu2-3, 112, ura3-52, Myo1-mCherry::KanMx, Vph1-GFP::HIS</i>                            | This study                   |
| DDY5795     | <i>MATα his3-Δ200, leu2-3, 112, ura3-52, Myo1-mCherry::KanMx, Cit1-GFP::HIS</i>                            | This study                   |
| DDY5796     | <i>MATα his3-Δ200, leu2-3, 112, ura3-52, Myo1-mCherry::KanMx, Nup59-GFP::HIS</i>                           | This study                   |
| DDY5797     | <i>MATα his3-Δ200, leu2-3, 112, ura3-52, Pex3-mCherry::KanMx, tpi1::pRS305-KAR2-GFP-HDEL</i>               | This study                   |
| DDY5798     | <i>MATα his3-Δ200, leu2-3, 112, ura3-52, Cit1-mCherry::KanMx, Vph1-GFP::HIS</i>                            | This study                   |
| DDY5799     | <i>MATa his3-Δ200, leu2-3, 112, ura3-52, Pex3-mCherry::KanMx, tpi1::pRS305-KAR2-GFP-HDEL</i>               | This study                   |
| DDY5800     | <i>MATa his3-Δ200, leu2-3, 112, ura3-52, Cit1-mCherry::KanMx, Pex3-GFP::HIS</i>                            | This study                   |
| DDY5801     | <i>MATa his3-Δ200, leu2-3, 112, ura3-52, Cit1-mCherry::KanMx, Vph1-GFP::HIS</i>                            | This study                   |

500

## Figure 1

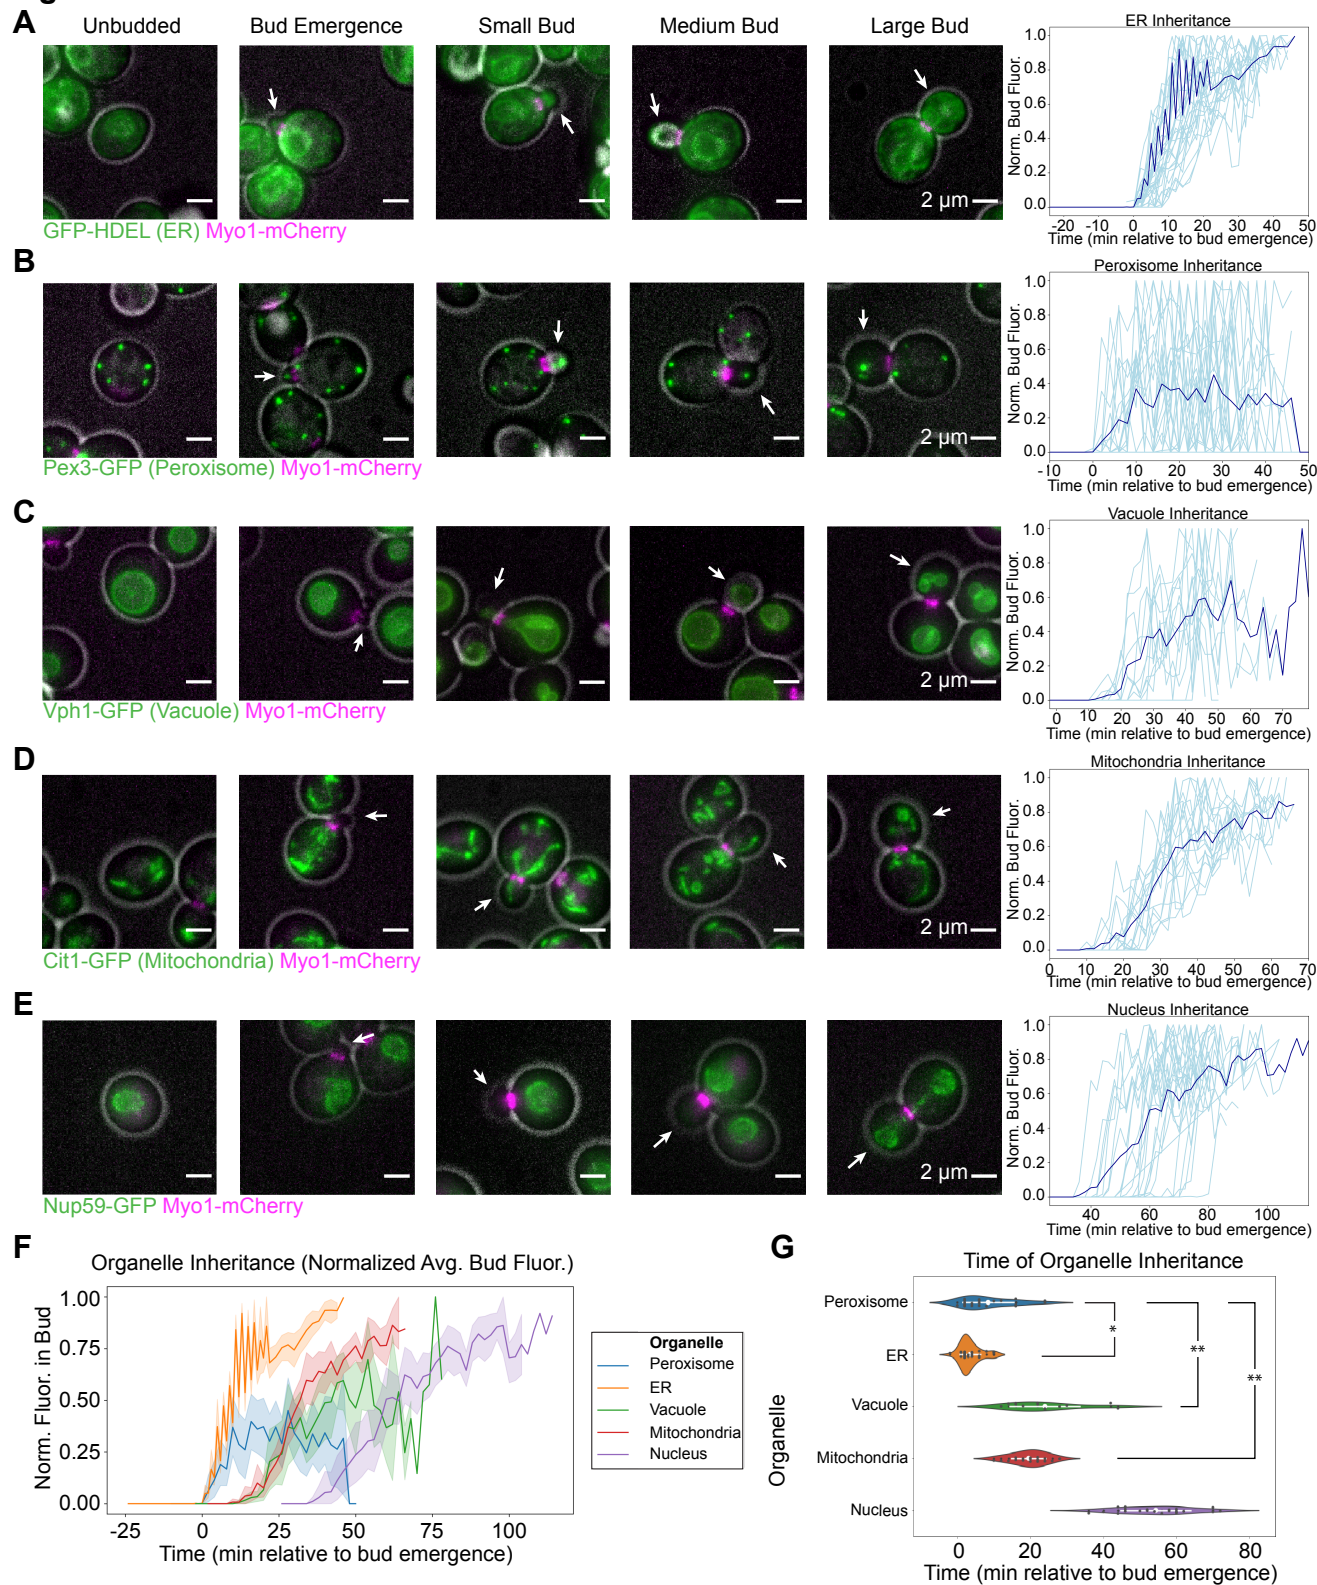

## Figure 2

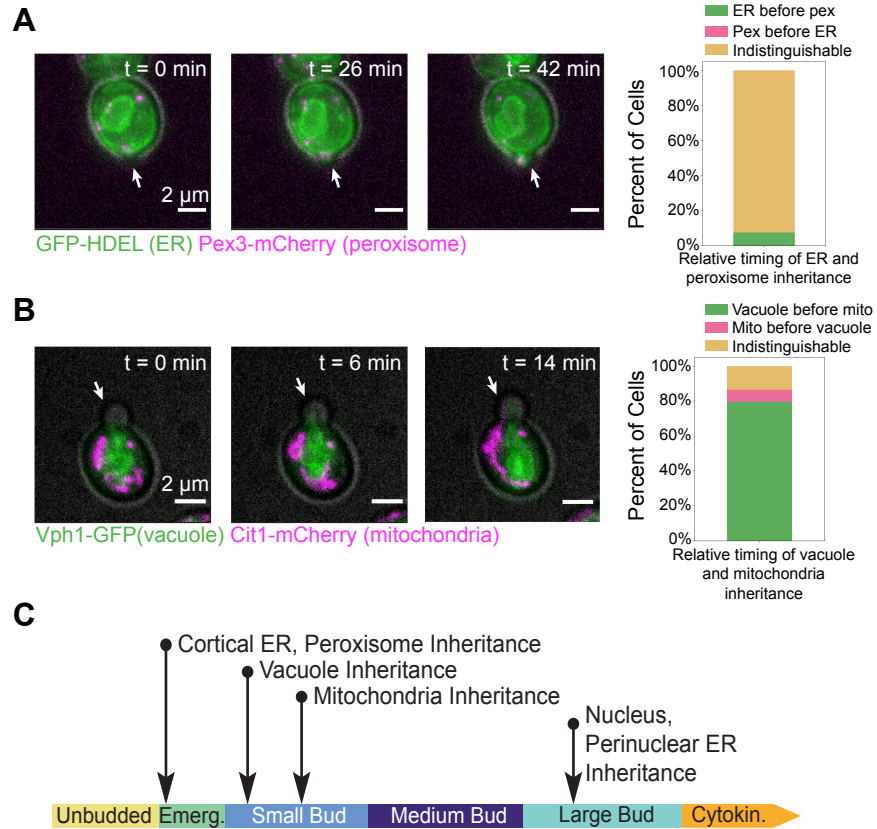

### Figure 3

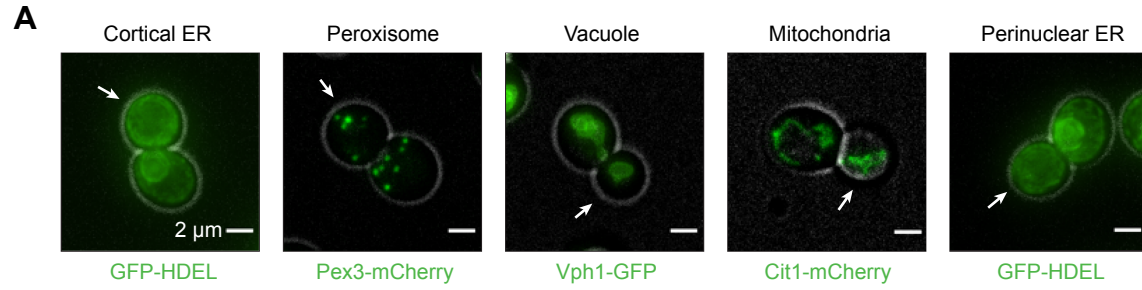

**B**

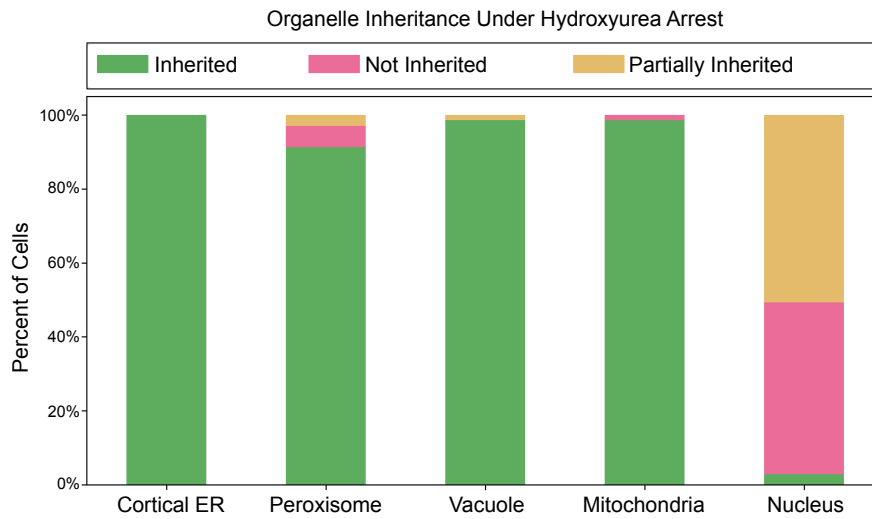



## Figure 4

**A**

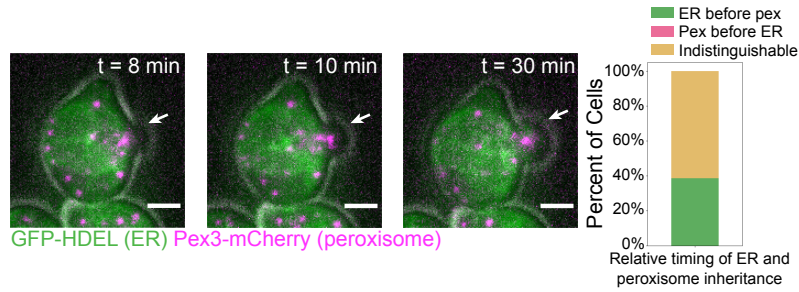

**B**

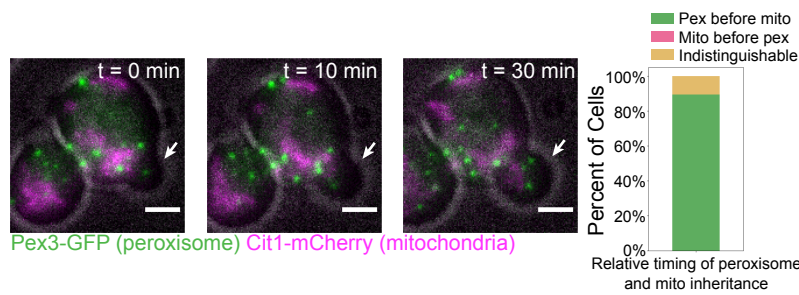

**C**

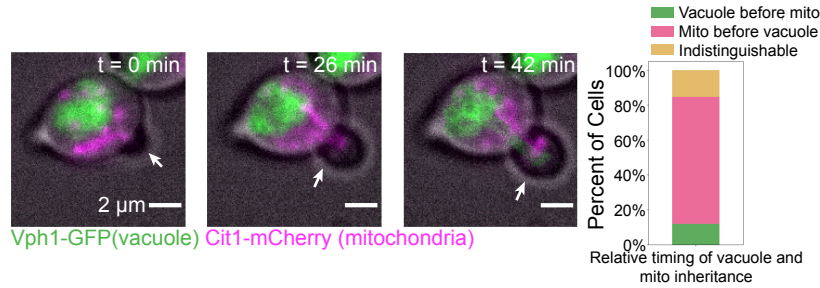

## Figure S1

**A** [hydroxyurea]:

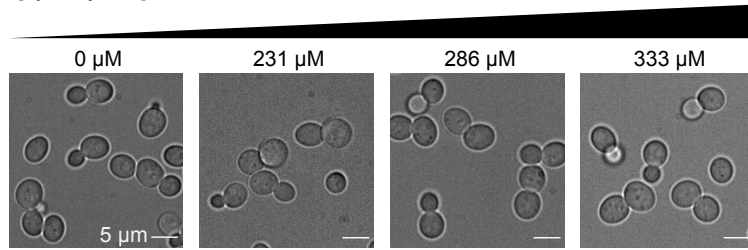

**B** [alpha factor]:

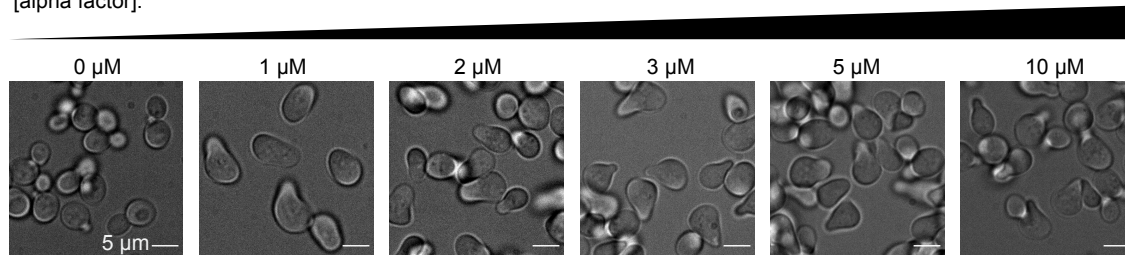

## Figure S2

**A**

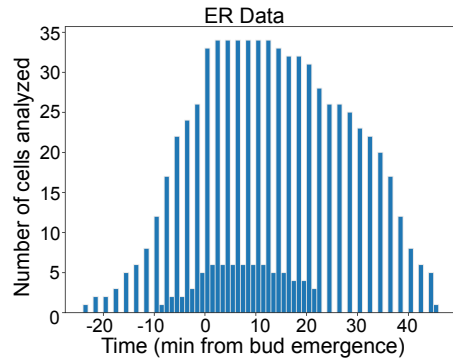

**B**

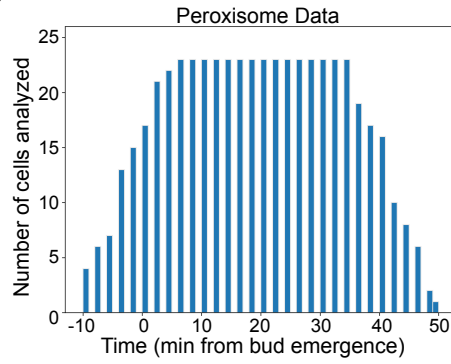

**C**

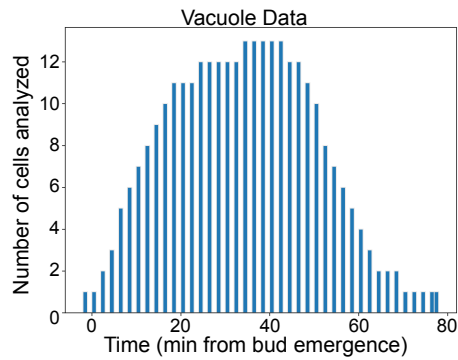

**D**

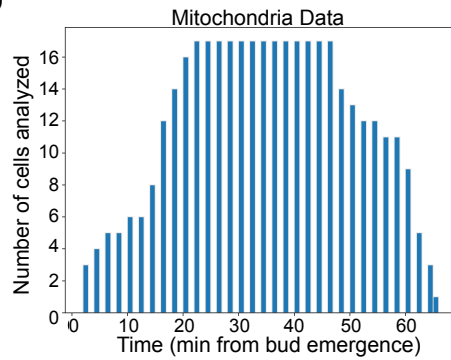

**E**

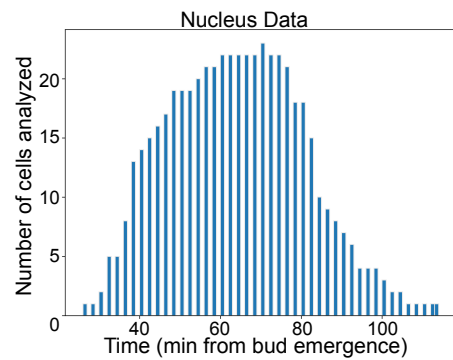

Source: http://biorxiv.org/content/10.1101/2021.04.28.441793v1.full.pdf
